# Supplementary material
Source: PubMed Central journal article supplement (PMC4707053)

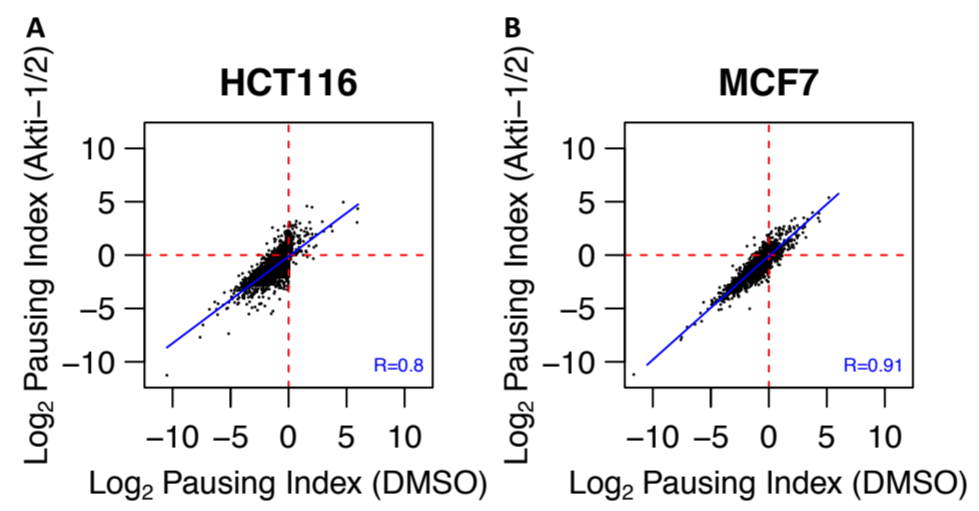

Supplement: NIHMS736953-supplement-2.pdf [file NIHMS736953-supplement-2.pdf]

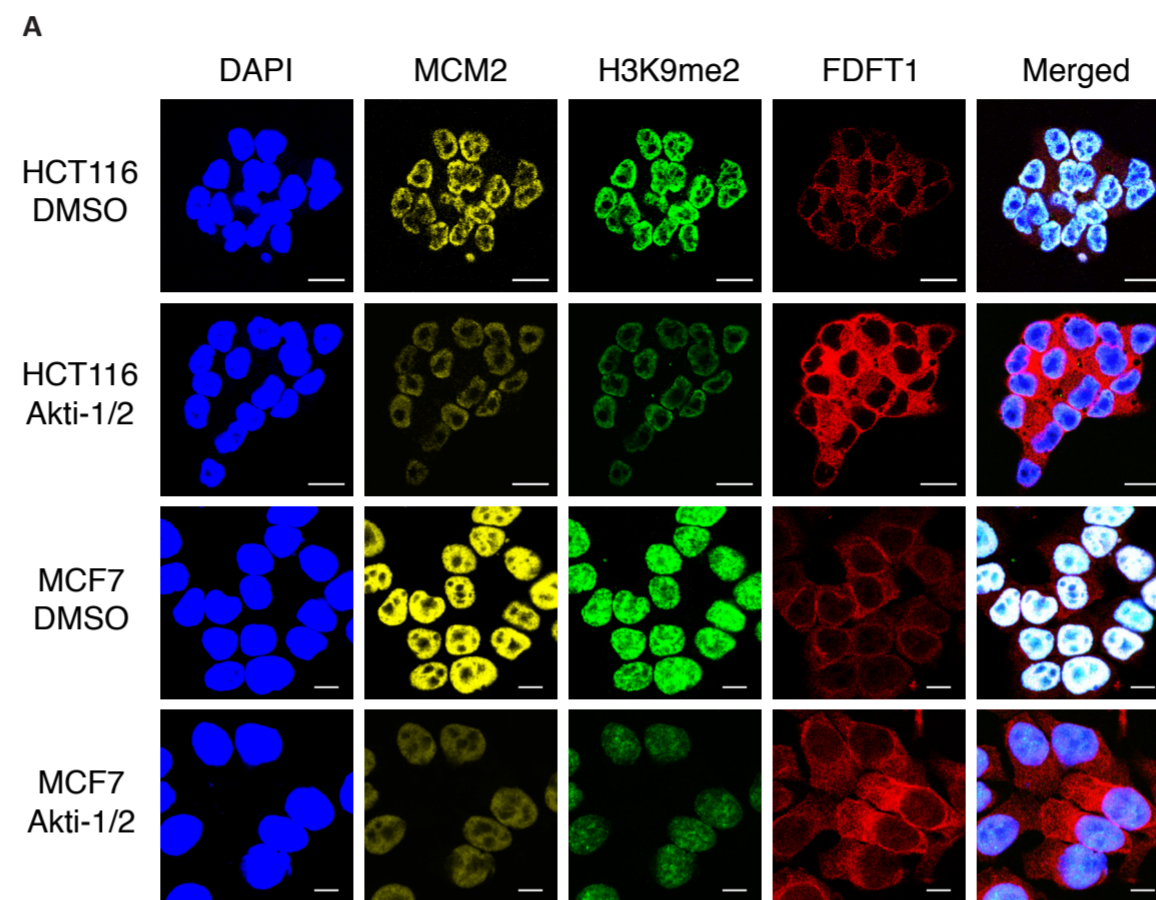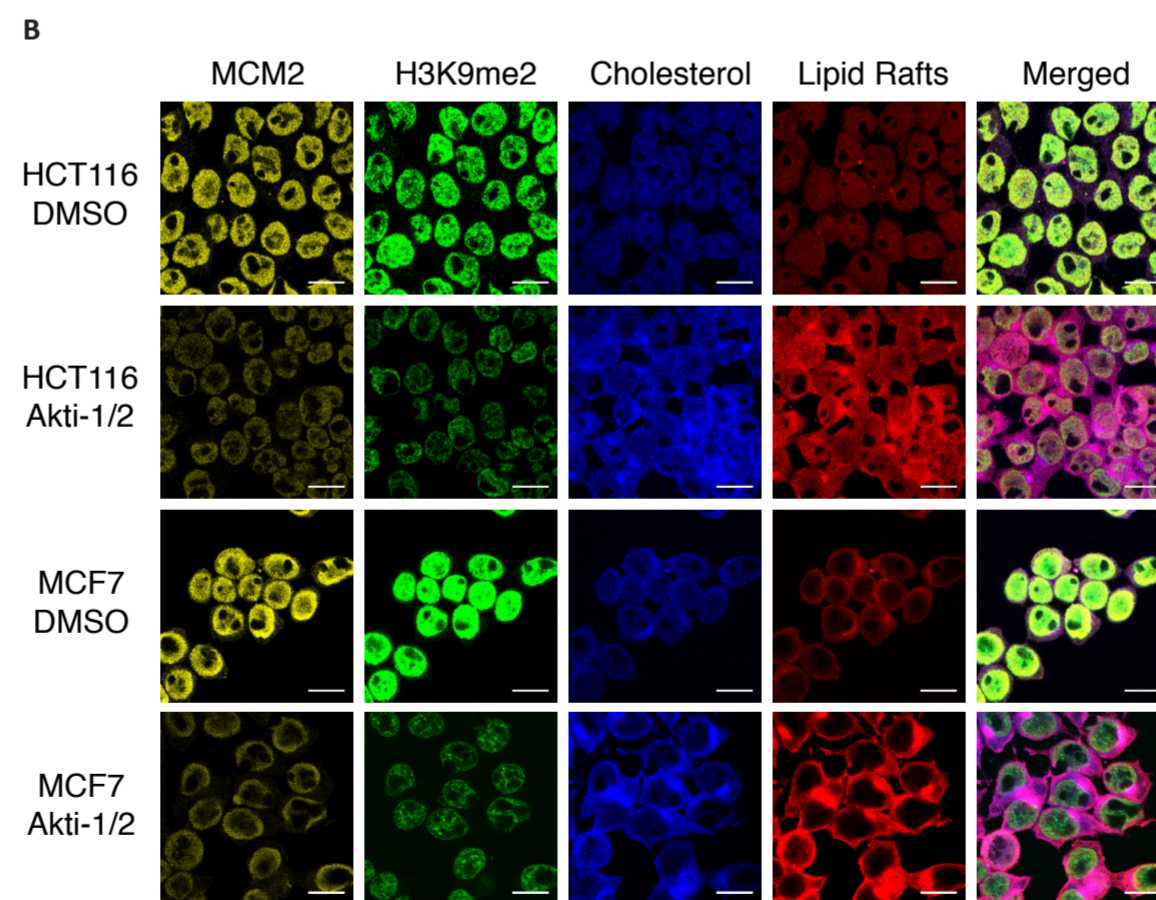

Supplement: NIHMS736953-supplement-3.pdf [file NIHMS736953-supplement-3.pdf]

# Supplementary Figure S3

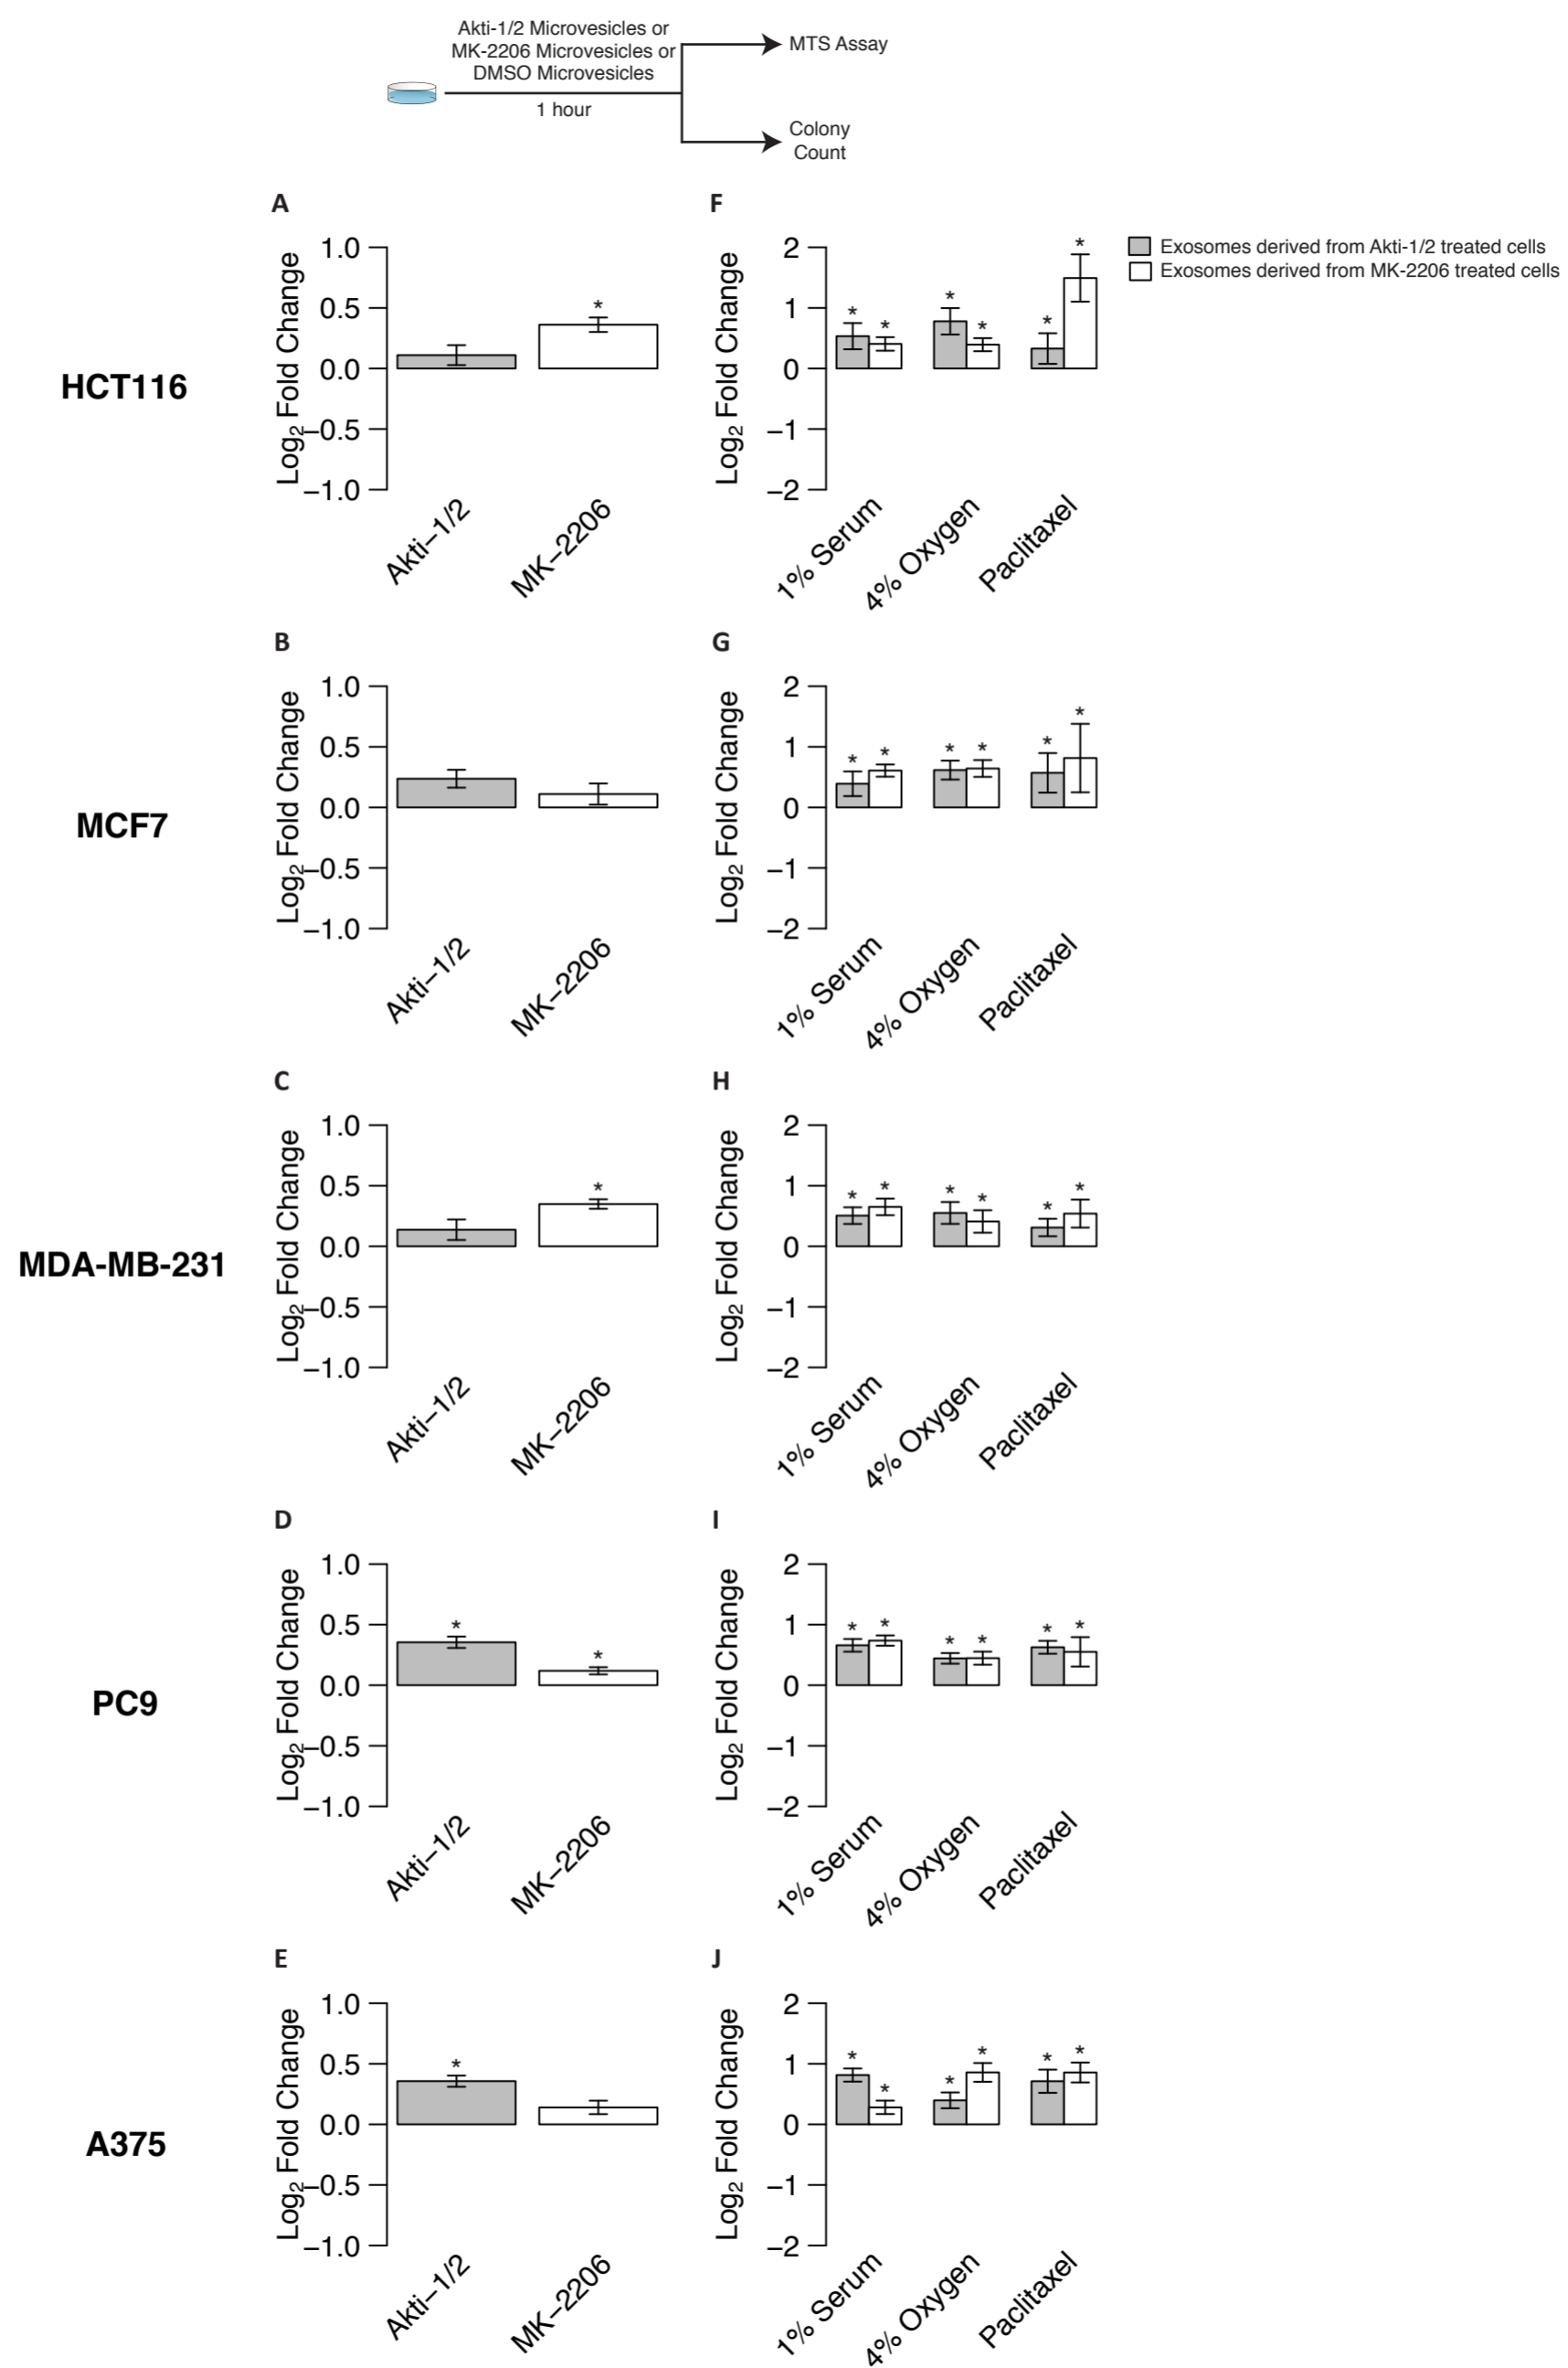

Supplement: NIHMS736953-supplement-4.pdf [file NIHMS736953-supplement-4.pdf]

# Supplementary Figure S4

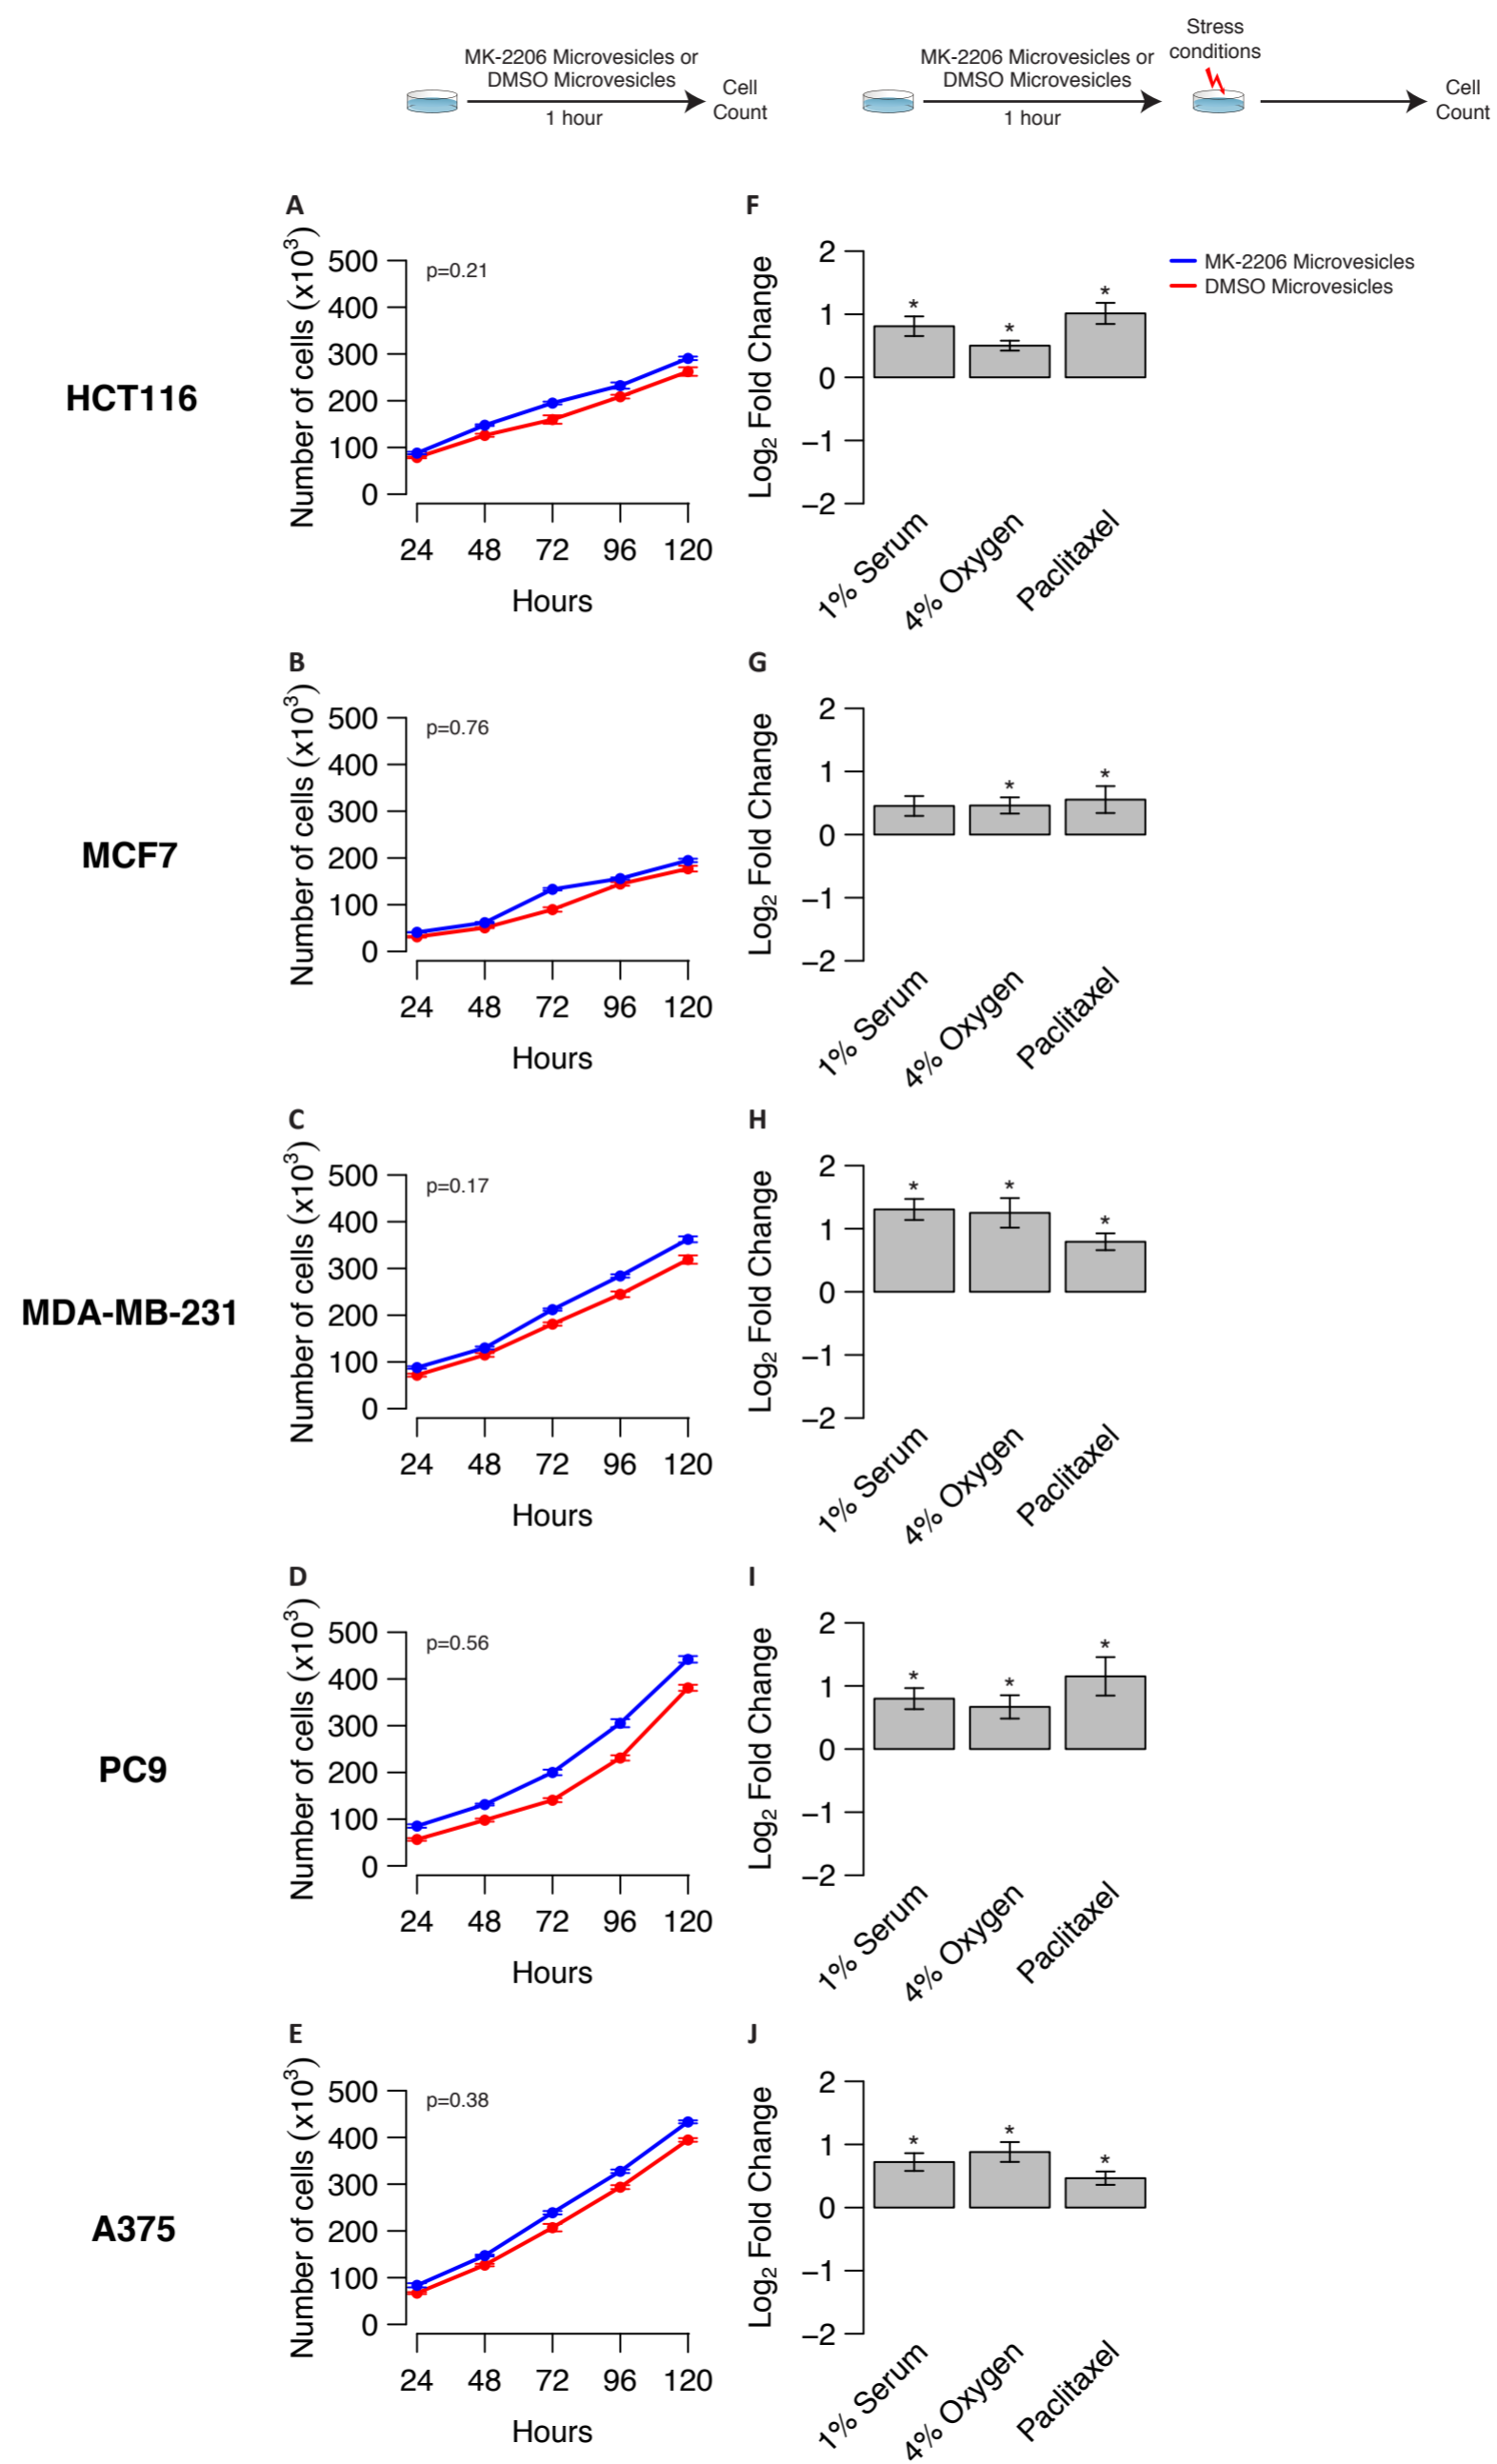

Supplement: NIHMS736953-supplement-5.pdf [file NIHMS736953-supplement-5.pdf]

# Supplementary Figure S5

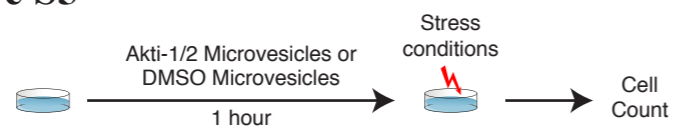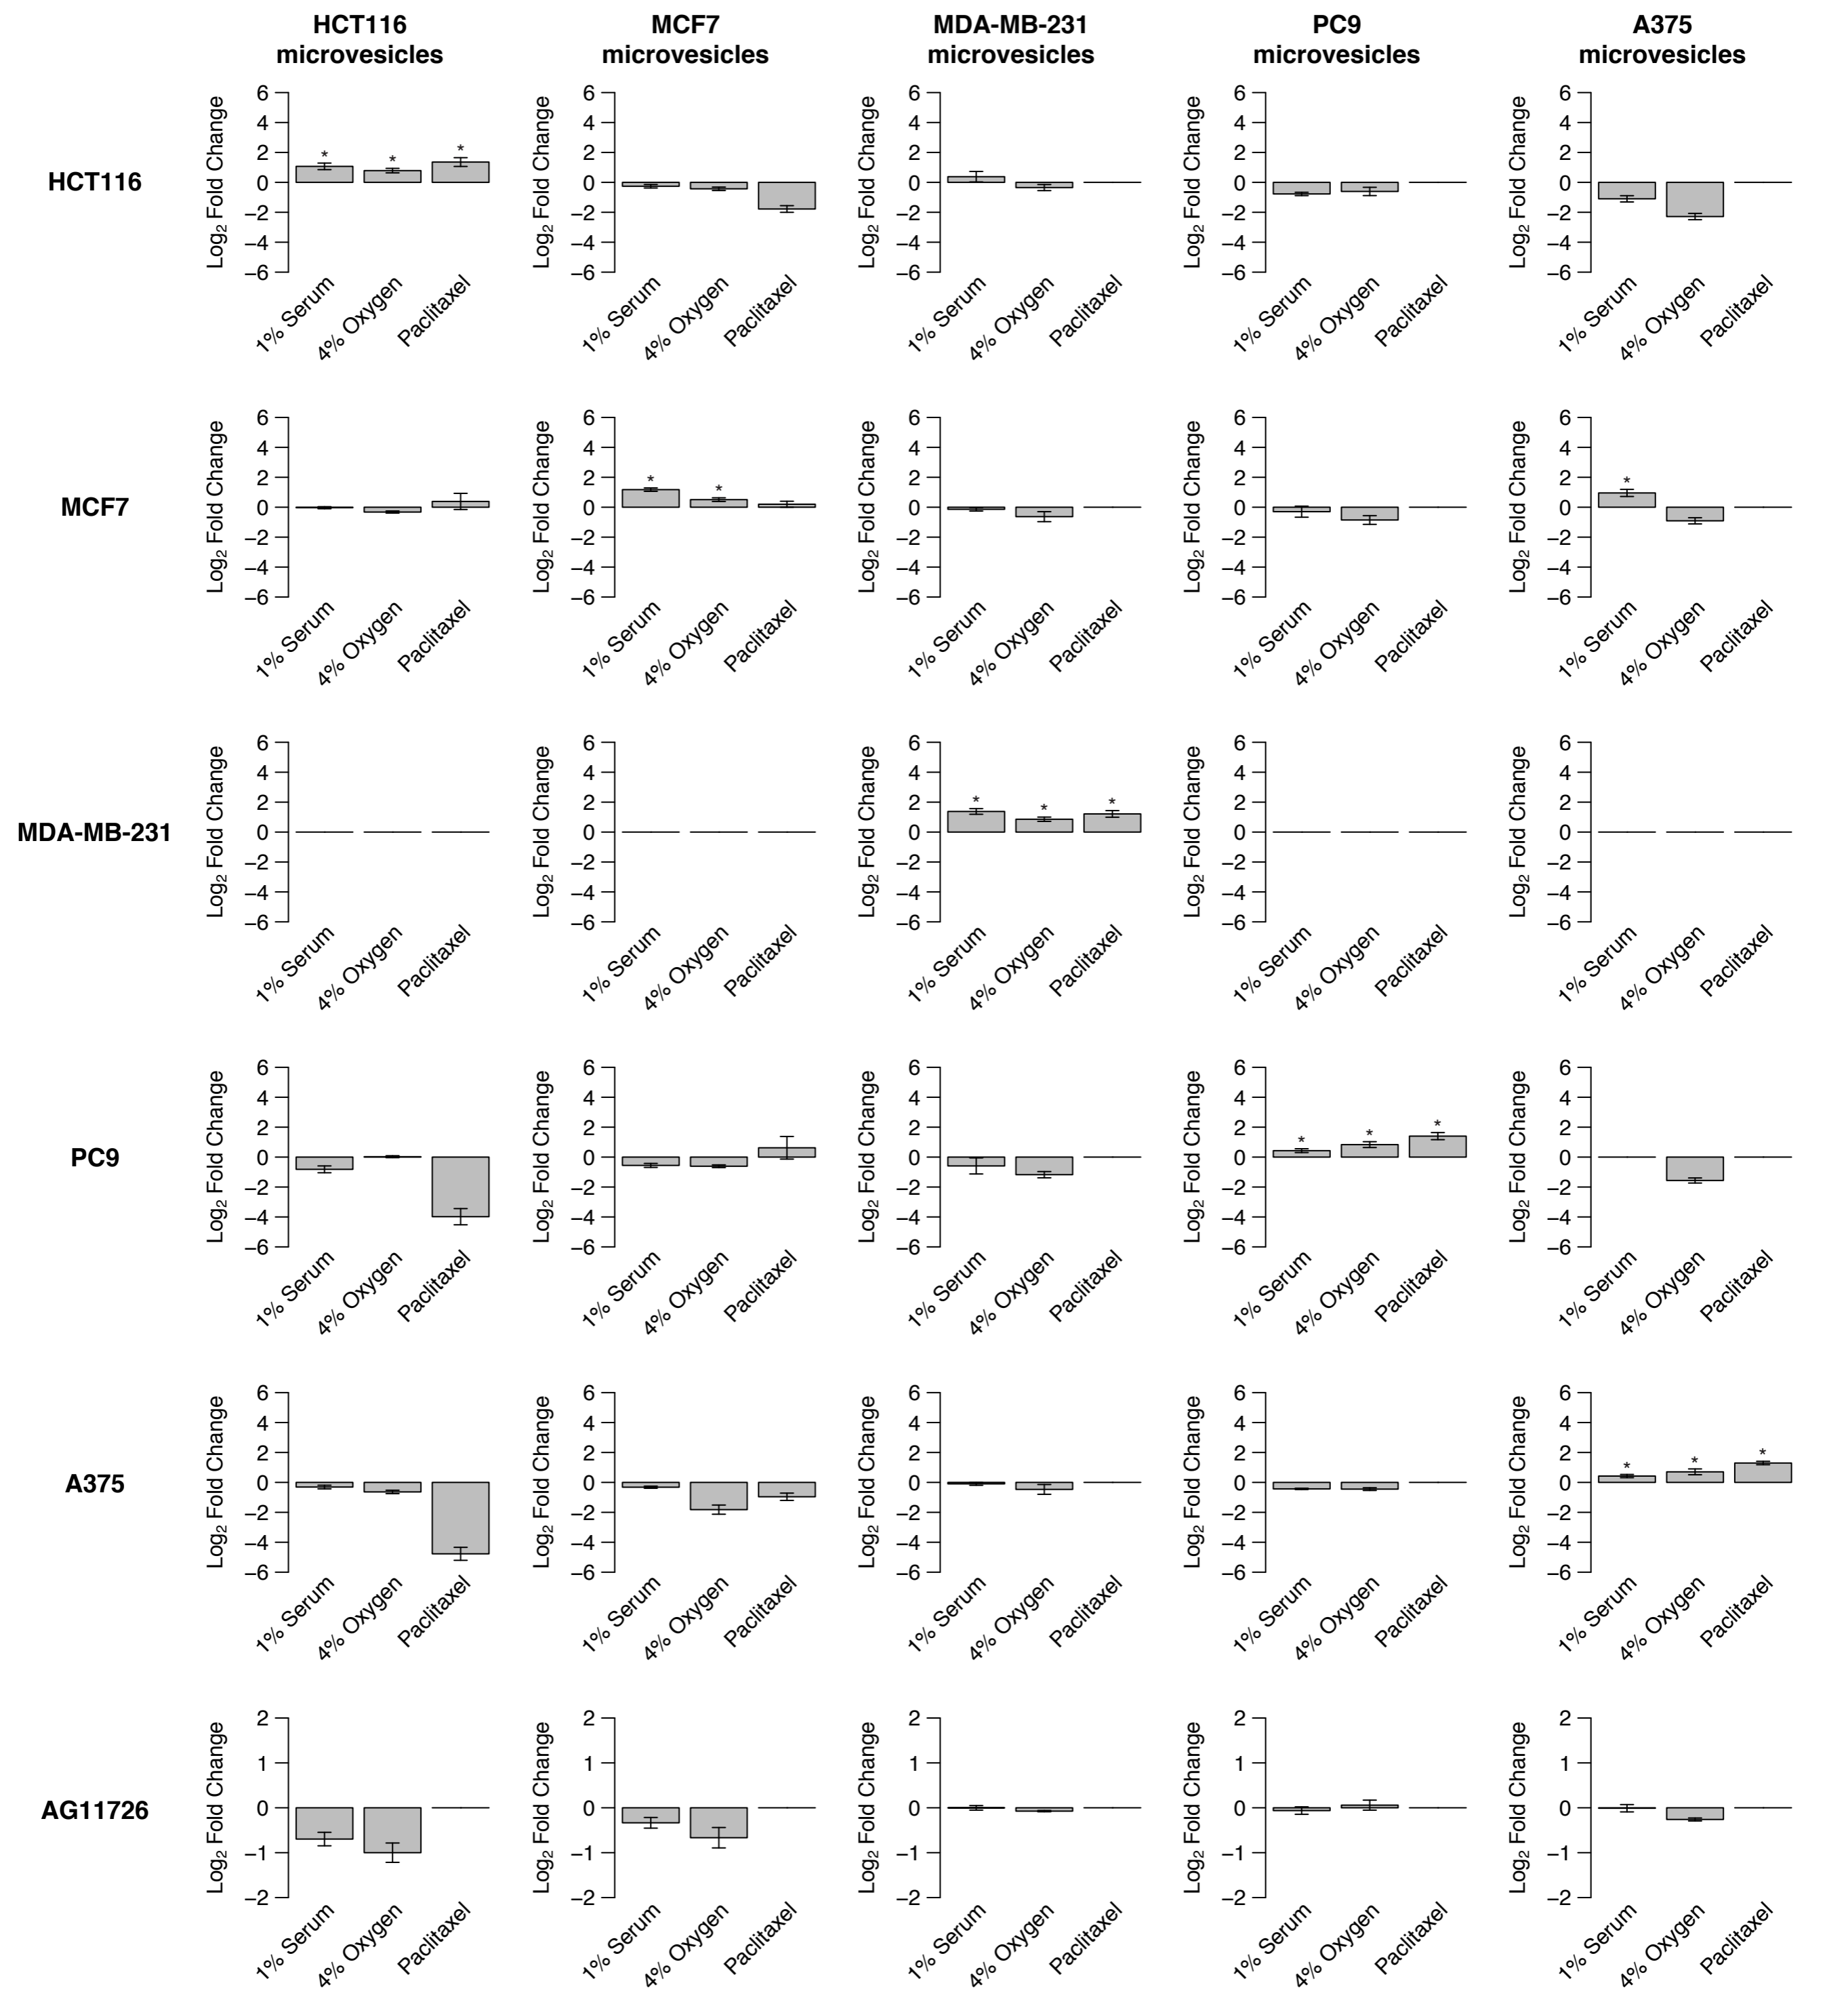

Supplement: NIHMS736953-supplement-6.pdf [file NIHMS736953-supplement-6.pdf]

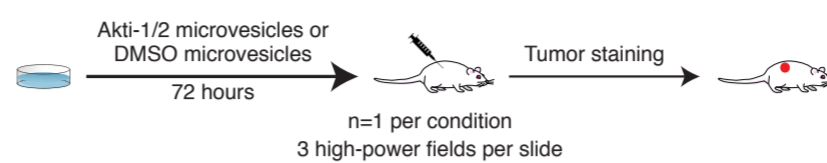

**MKI67**

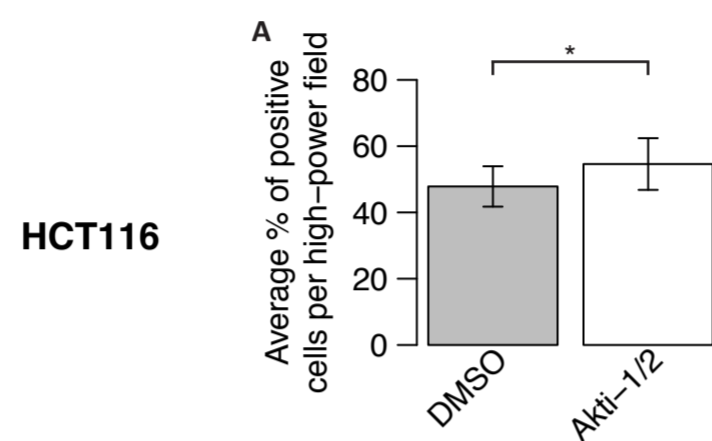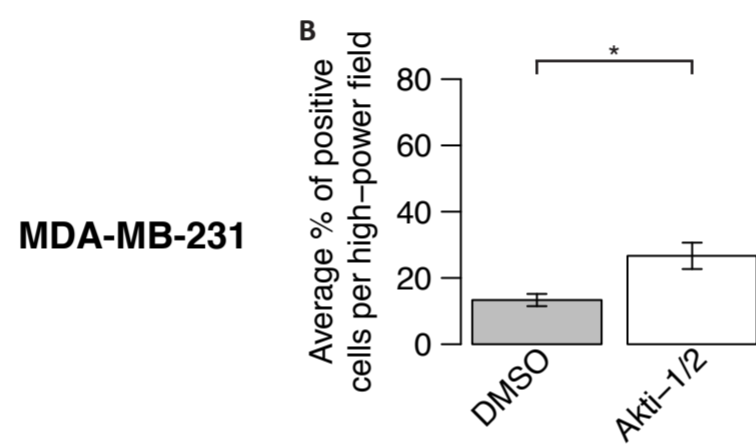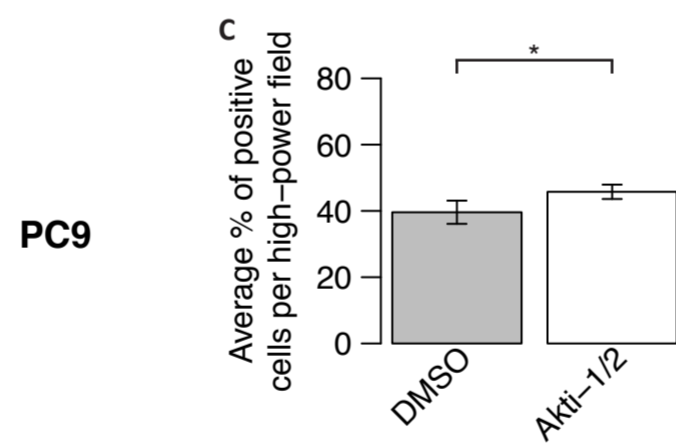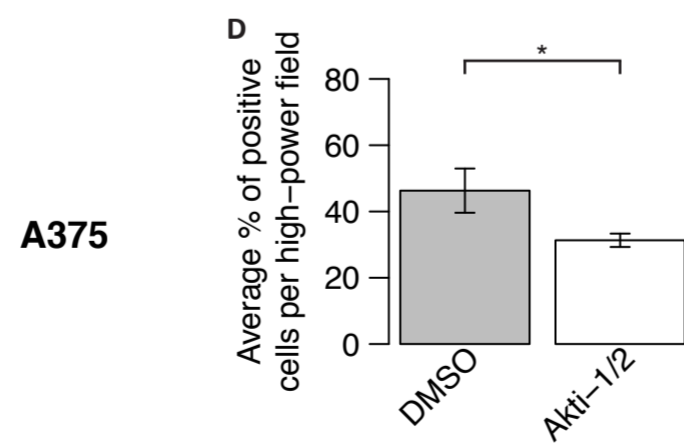

Supplement: NIHMS736953-supplement-7.pdf [file NIHMS736953-supplement-7.pdf]

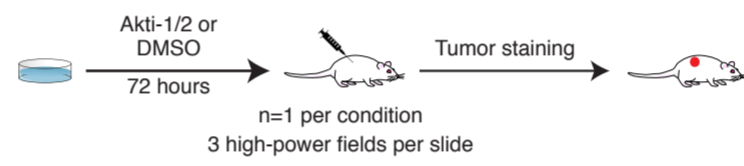

**MKI67**

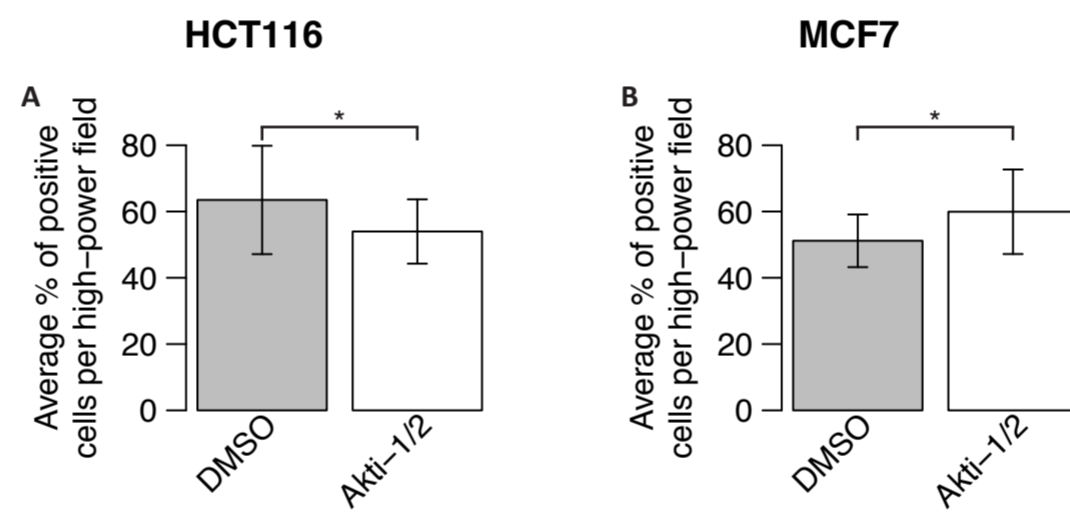

Supplement: NIHMS736953-supplement-8.pdf [file NIHMS736953-supplement-8.pdf]
